# Supplementary material
Source: PubMed Central journal article supplement (PMC4340684)

Supplemental Material for

Rat Hormone Sensitive Lipase Inhibition by  
Cyclipostins and Their Analogs

Elena Vasilieva, Supratik Dutta, Raj Malla, Benjamin Martin,  
Christopher D. Spilling, and Cynthia M. Dupureur\*

Department of Chemistry & Biochemistry and the Center for  
Nanoscience, University of Missouri St. Louis,  
St. Louis, MO 63121

**Supporting Information**

**Table of contents**

|                                                                                                                                                                      |     |
|----------------------------------------------------------------------------------------------------------------------------------------------------------------------|-----|
| $^1\text{H}$ , $^{13}\text{C}$ and $^{31}\text{P}$ NMR spectra for cyclipostin R <i>cis</i> ( <b>3b</b> )                                                            | S2  |
| $^1\text{H}$ , $^{13}\text{C}$ and $^{31}\text{P}$ NMR spectra for cyclipostin R <i>trans</i> ( <b>3a</b> )                                                          | S3  |
| $^1\text{H}$ , $^{13}\text{C}$ and $^{31}\text{P}$ NMR spectra for cyclipostin R <i>trans</i> phosphonate analog ( <b>5a</b> )                                       | S4  |
| $^1\text{H}$ , $^{13}\text{C}$ and $^{31}\text{P}$ NMR spectra for cyclipostin R <i>cis</i> phosphonate analog ( <b>5b</b> )                                         | S5  |
| $^1\text{H}$ , $^{13}\text{C}$ and $^{31}\text{P}$ NMR spectra for cyclipostin P <i>cis</i> phosphonate analog ( <b>6b</b> )                                         | S6  |
| $^1\text{H}$ , $^{13}\text{C}$ and $^{31}\text{P}$ NMR spectra for cyclipostin P <i>trans</i> phosphonate analog ( <b>6a</b> )                                       | S7  |
| Chemical characterization and $^1\text{H}$ , $^{13}\text{C}$ and $^{31}\text{P}$ NMR spectra for cyclophostin P monocyclic phosphonate analog ( <b>13</b> )          | S8  |
| $^1\text{H}$ , $^{13}\text{C}$ and $^{31}\text{P}$ NMR spectra for cyclipostin P monocyclic phosphate analog ( <b>14</b> )                                           | S10 |
| Chemical characterization and $^1\text{H}$ , $^{13}\text{C}$ and $^{31}\text{P}$ NMR spectra for cyclophostin P difluoro monocyclic phosphonate analog ( <b>15</b> ) | S11 |
| $^1\text{H}$ , $^{31}\text{P}$ , $^{13}\text{C}$ , and $^{19}\text{F}$ NMR spectra for cyclipostin P difluoro monocyclic phosphonate analog ( <b>16</b> )            | S13 |

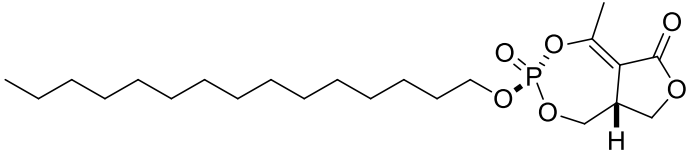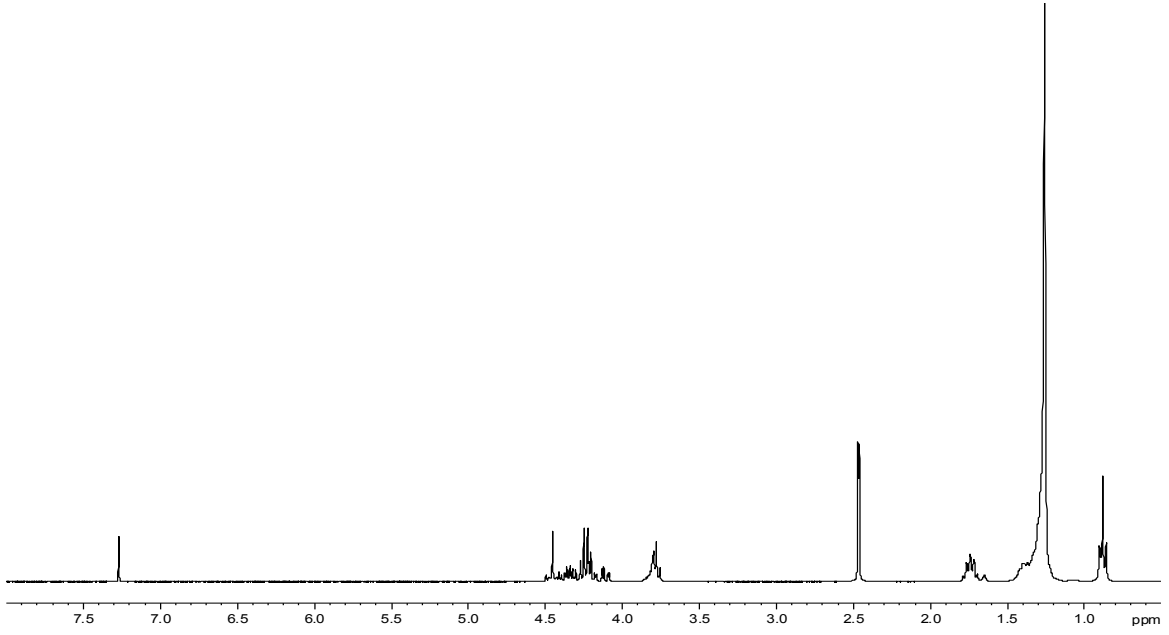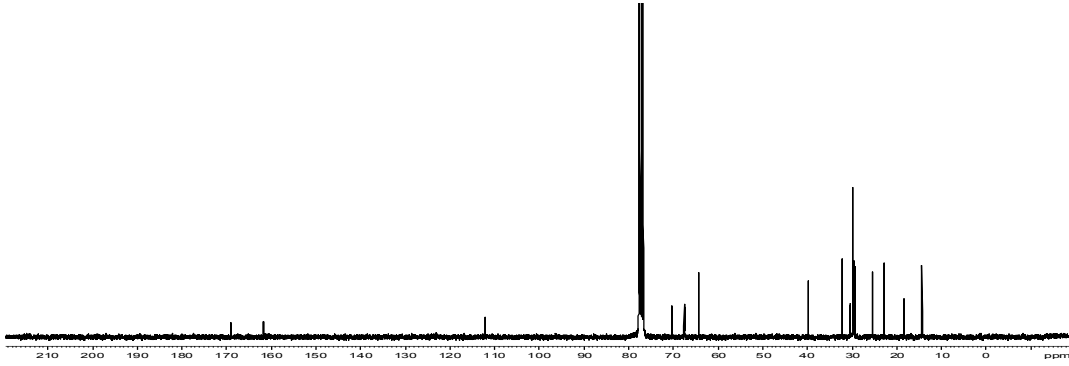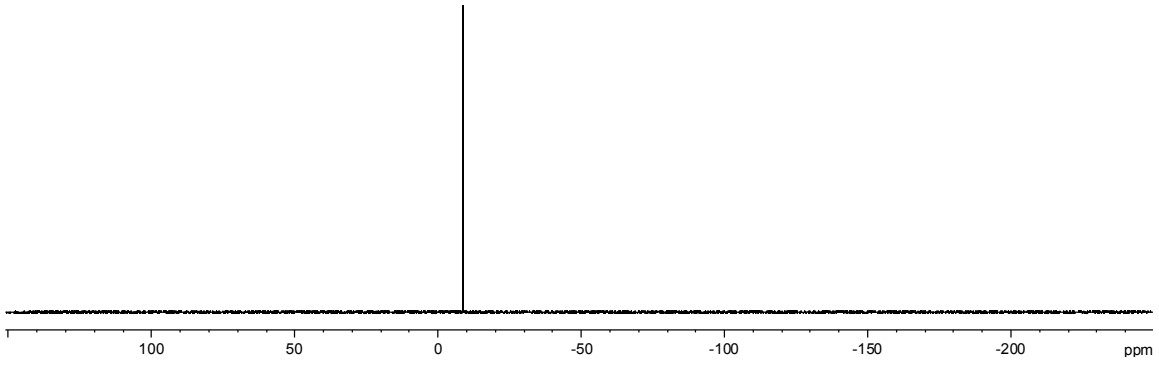

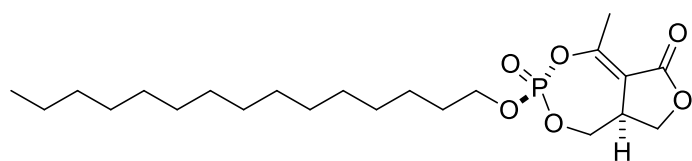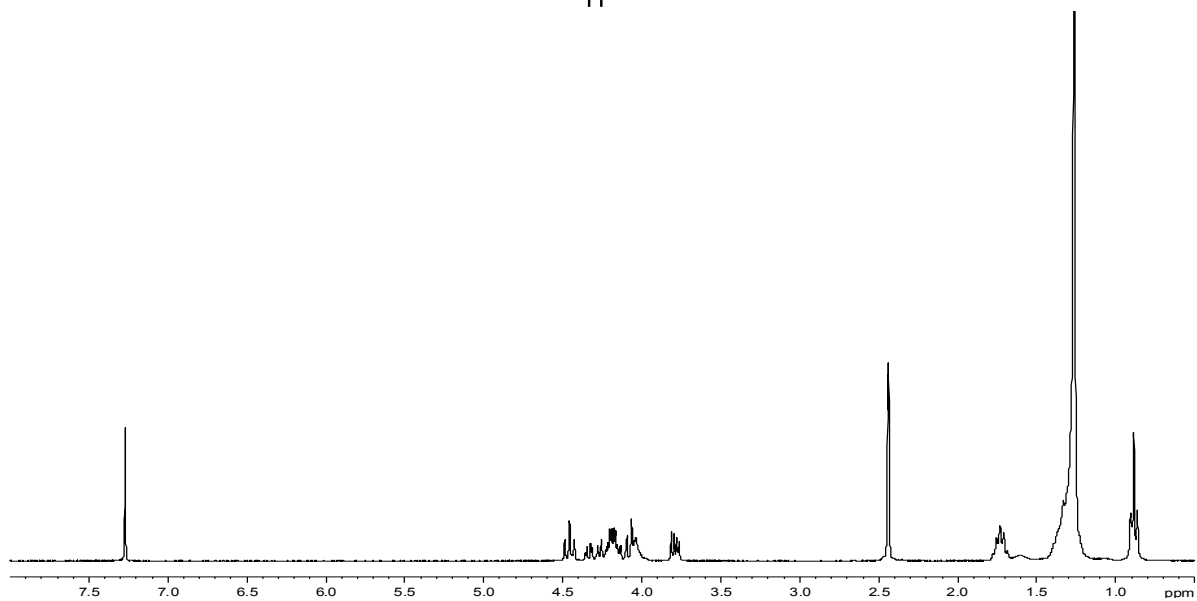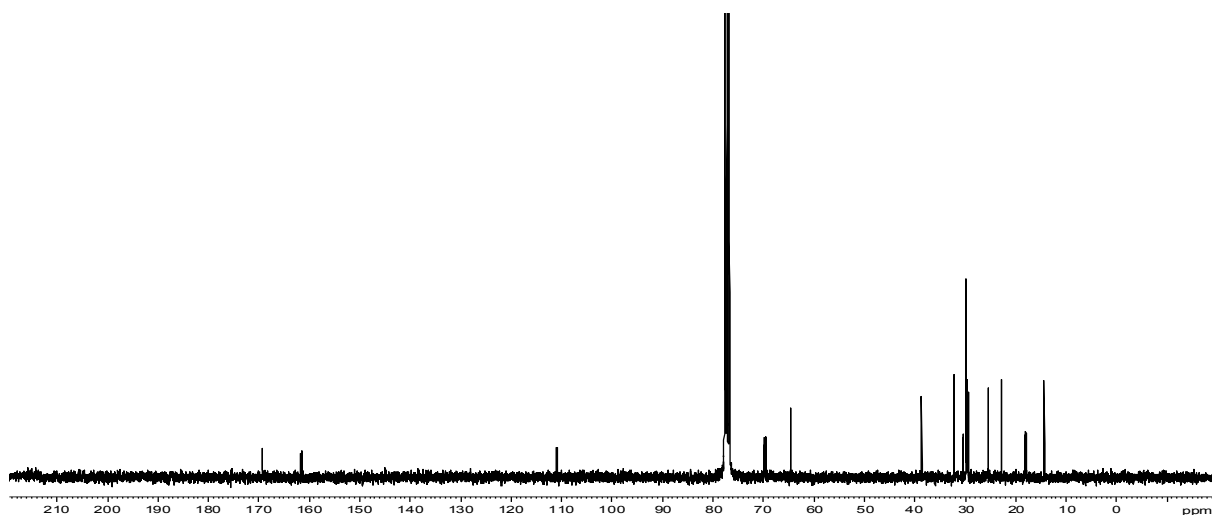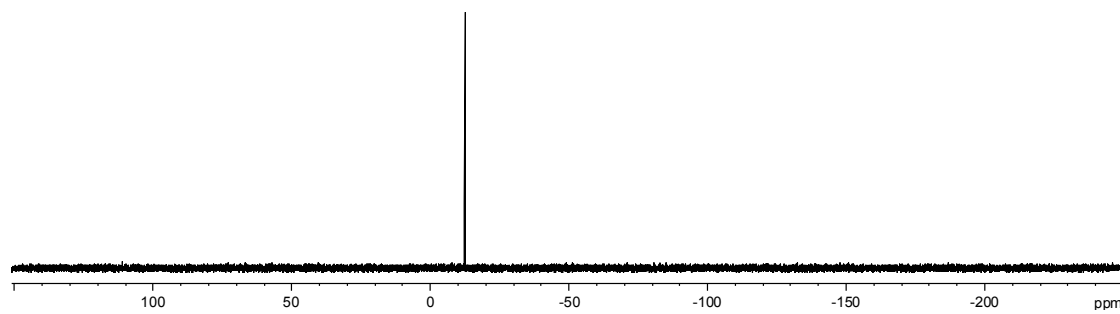

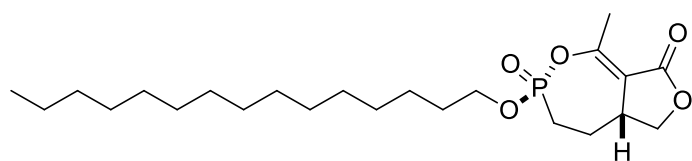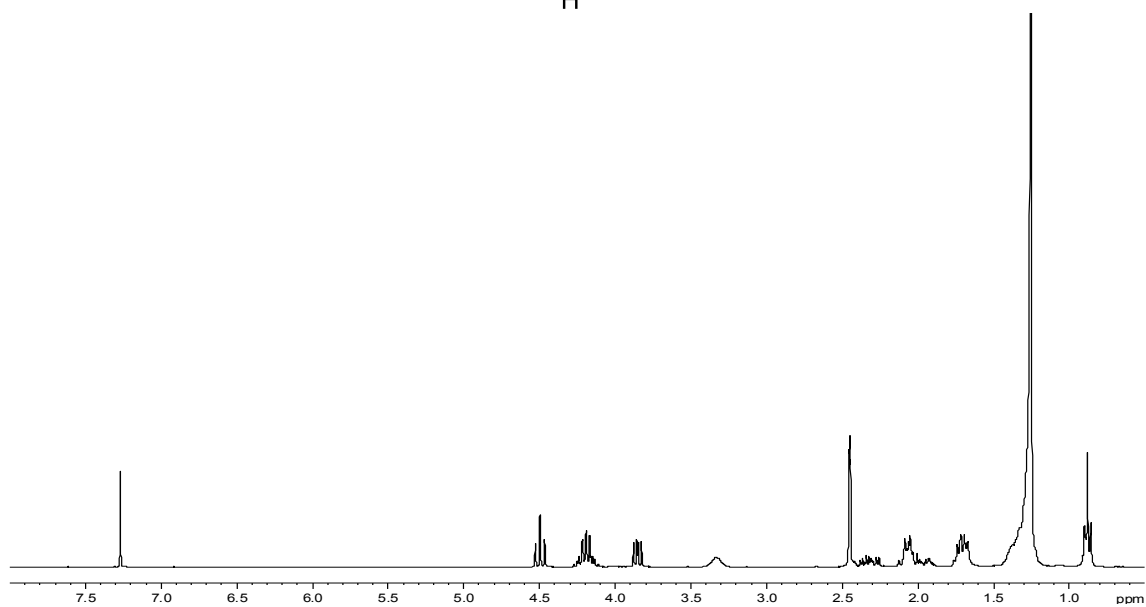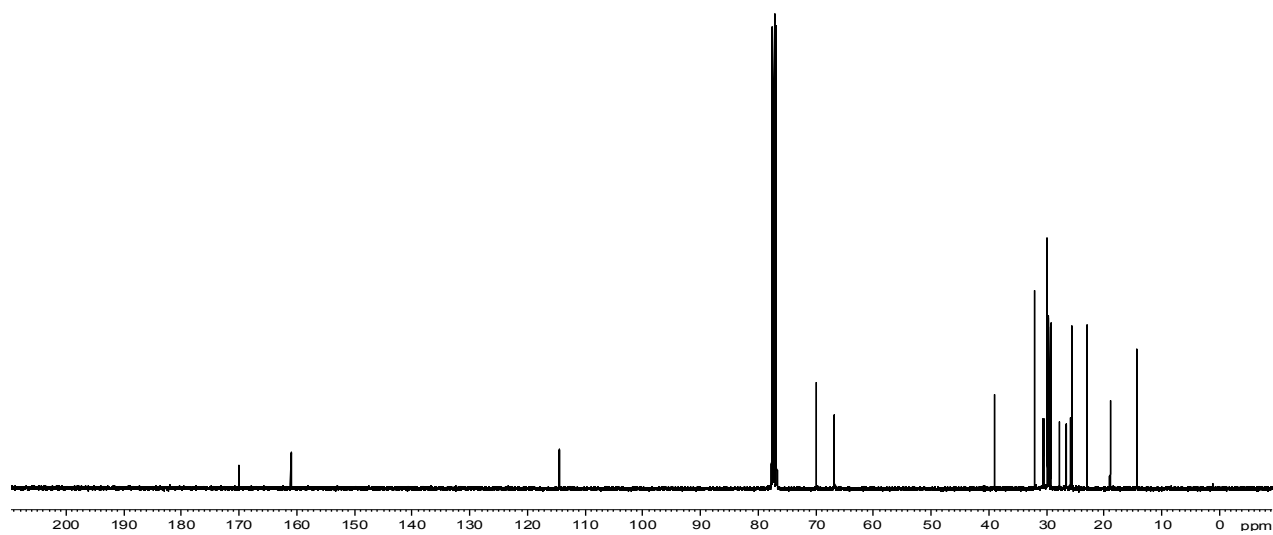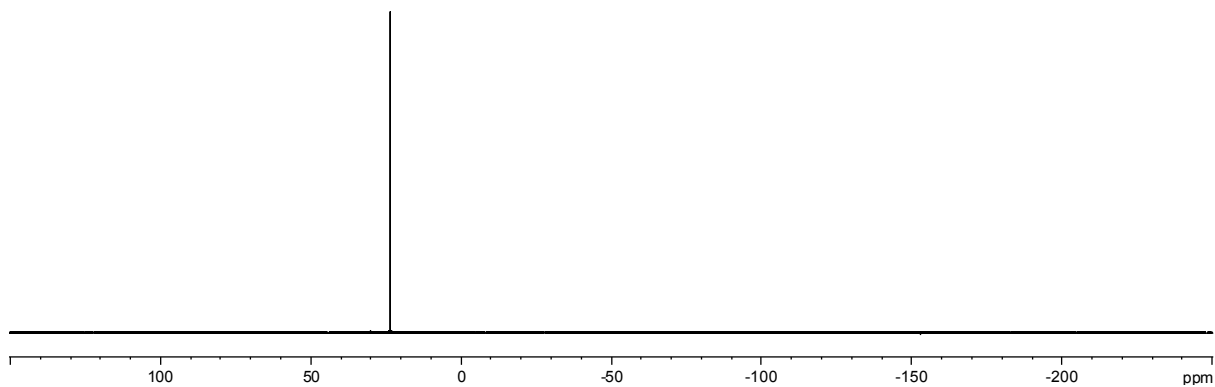

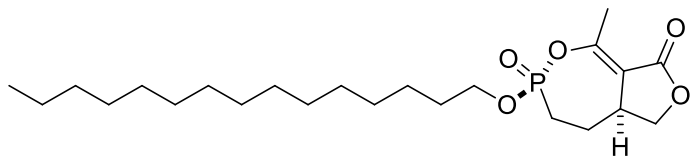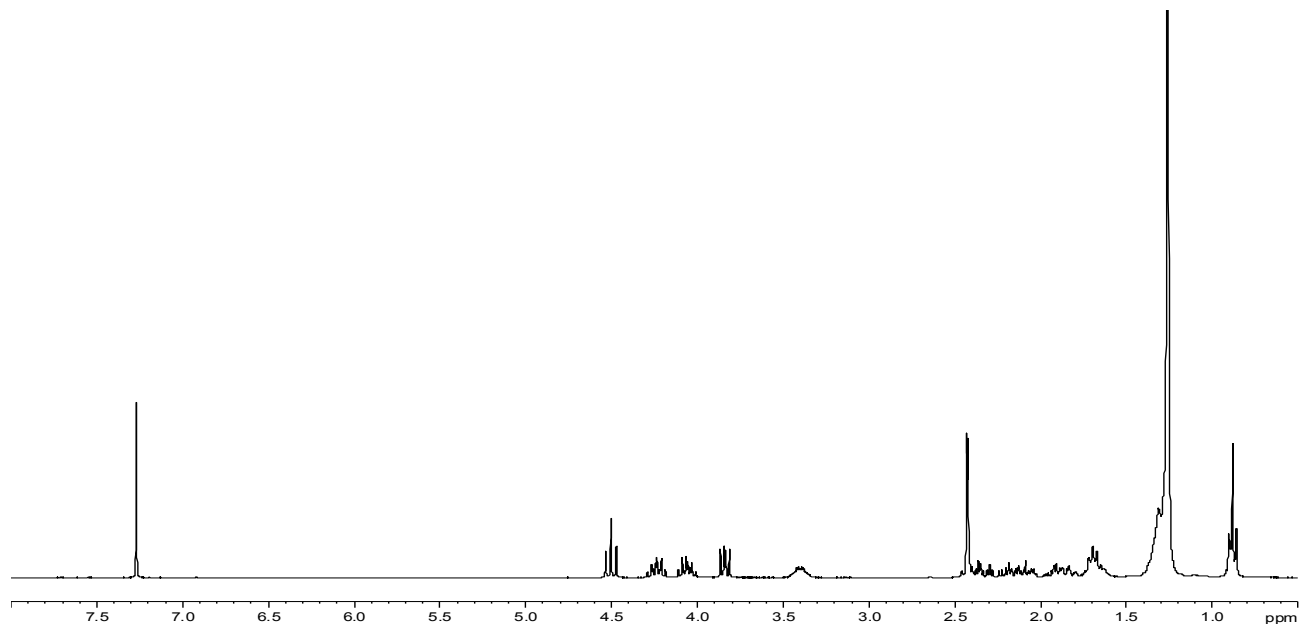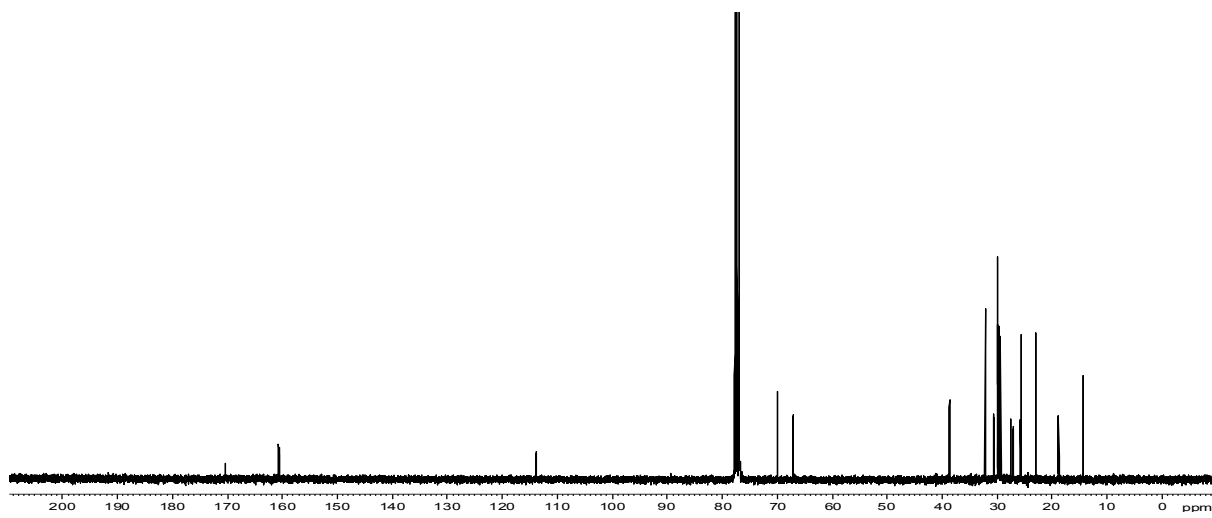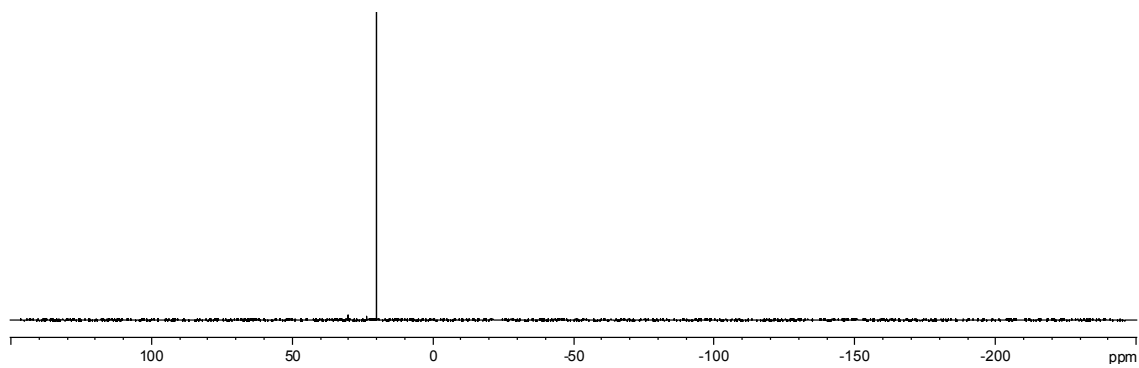

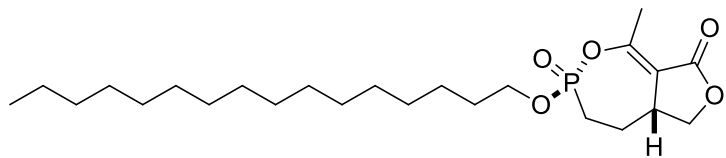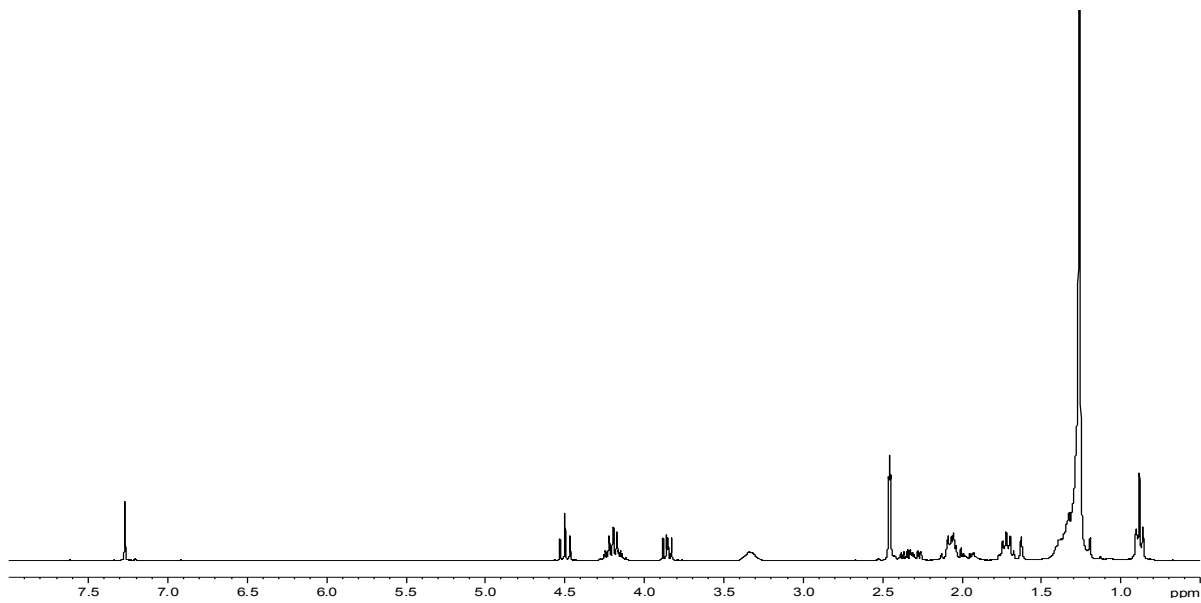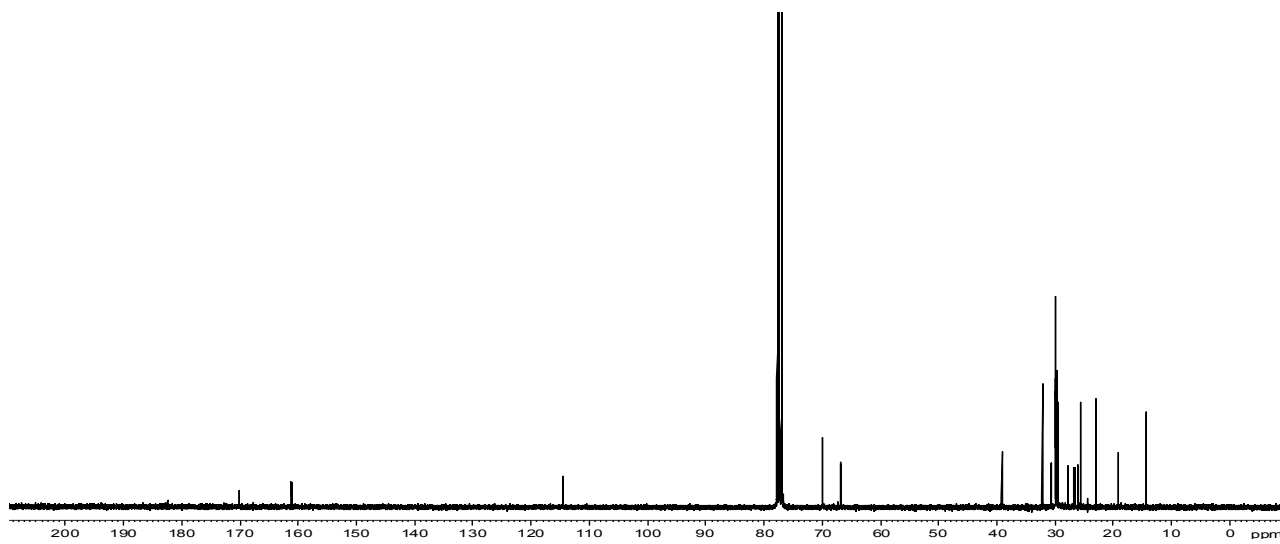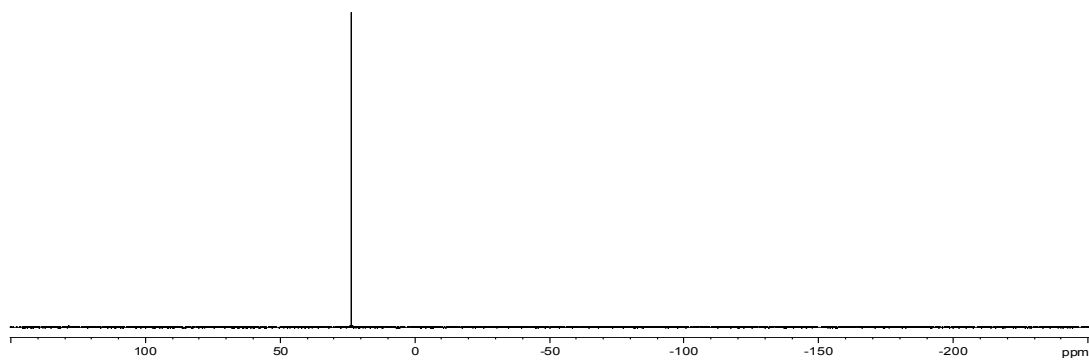

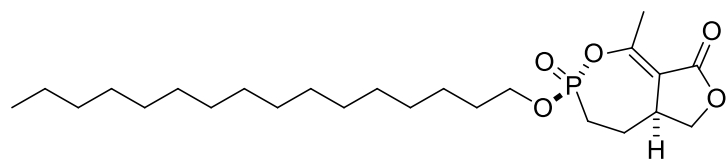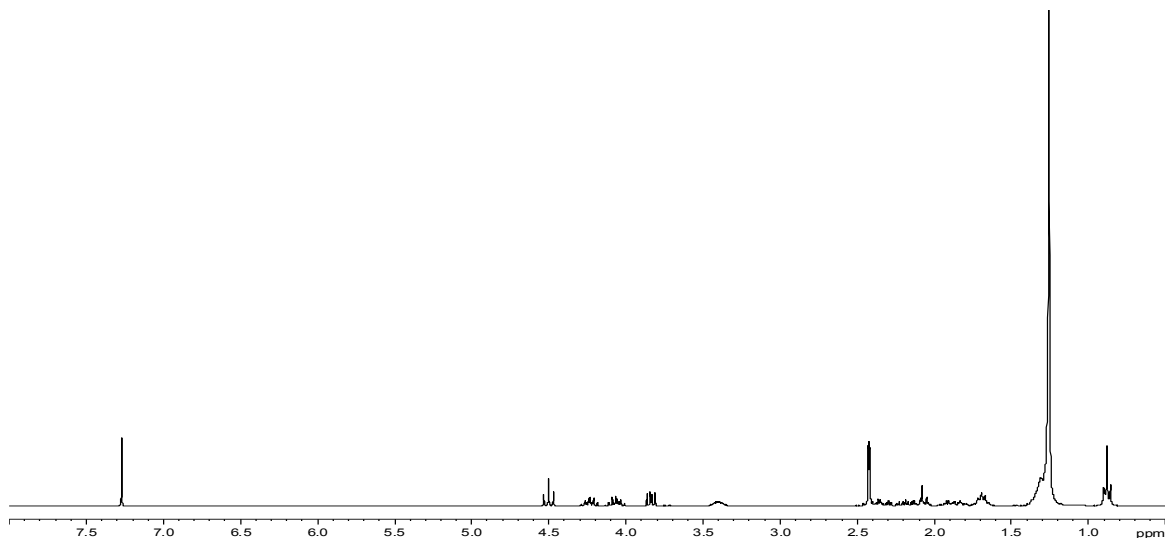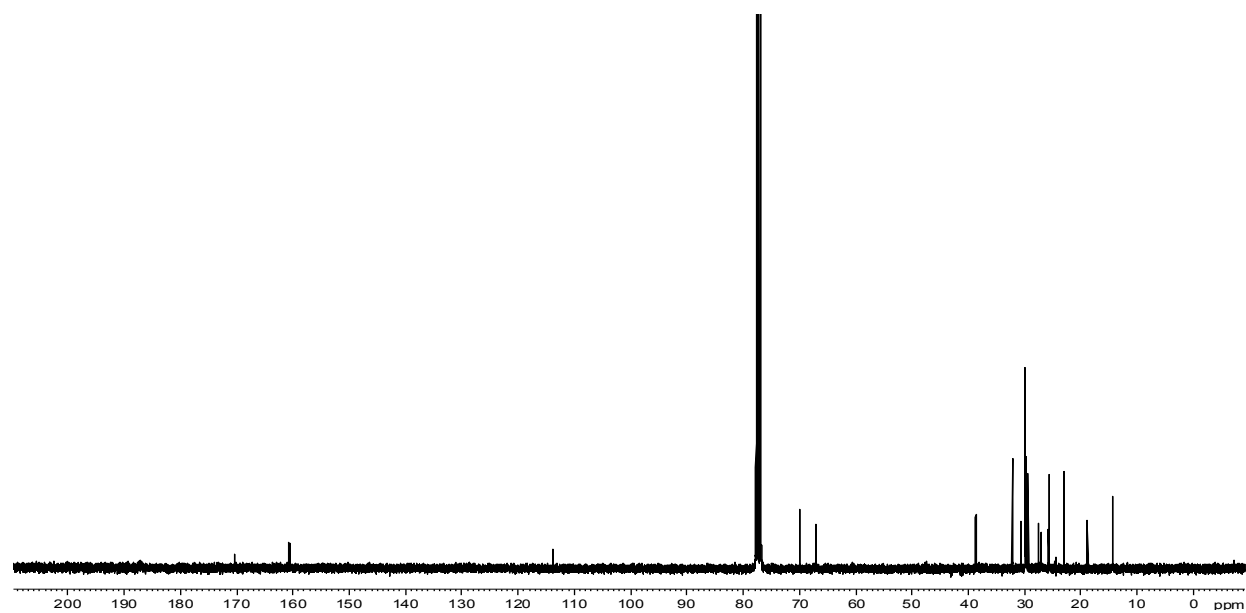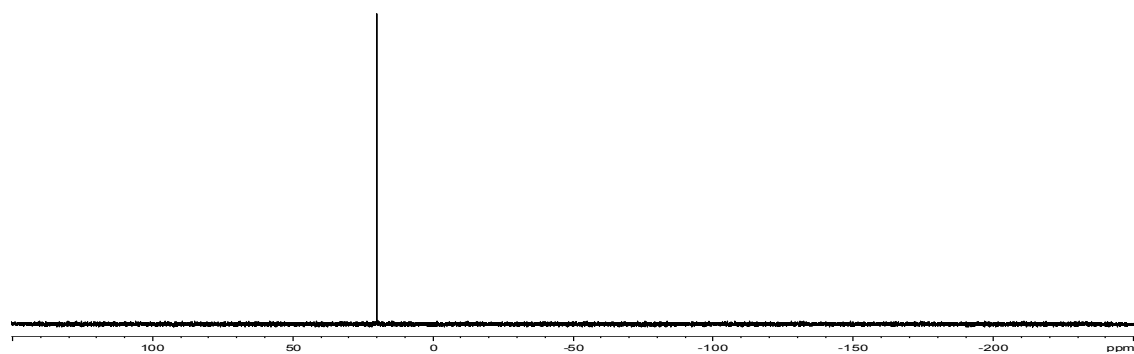

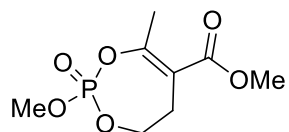

**methyl 2-methoxy-4-methyl-6,7-dihydro-1,3,2-dioxaphosphepine-5-carboxylate 2-oxide (YY).** IR (neat, NaCl) 2960, 2917, 1718, 1652  $\text{cm}^{-1}$ ;  $^1\text{H}$  NMR (300 MHz,  $\text{CDCl}_3$ )  $\delta$  4.39 (1H, m), 4.18 (1H, m), 3.88 (3H, d,  $J_{HP} = 11.5$  Hz), 3.78 (3H, s), 3.00 (1H, ddd,  $J_{HH} = 15.7, 9.4, 3.7$  Hz), 2.85 (1H, ddd,  $J_{HH} = 15.8, 6.4, 3.4$  Hz);  $^{13}\text{C}$  NMR (75.4 MHz,  $\text{CDCl}_3$ )  $\delta$  167.2 (d,  $J_{CP} = 2.0$  Hz), 161.0 (d,  $J_{CP} = 9.6$  Hz), 115.7 (d,  $J_{CP} = 3.5$  Hz), 68.5 (d,  $J_{CP} = 6.6$  Hz), 55.1 (d,  $J_{C,P} = 5.5$  Hz), 52.2, 28.4, 20.4 (d,  $J_{C,P} = 4.1$  Hz),  $^{31}\text{P}\{^1\text{H}$  NMR (121.4 MHz,  $\text{CDCl}_3$ )  $\delta$  -9.94; HRMS (FAB, NBA,  $\text{MH}^+$ ) calcd for  $\text{C}_8\text{H}_{14}\text{O}_6\text{P}$ : 237.0528, found 237.0528.

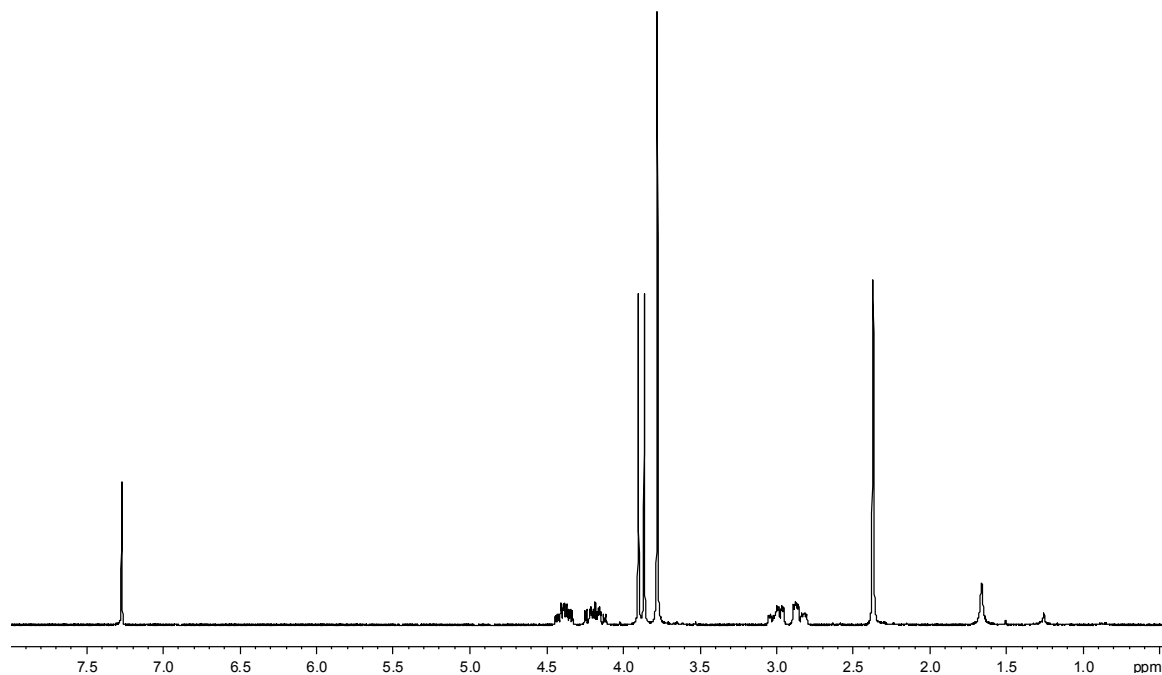



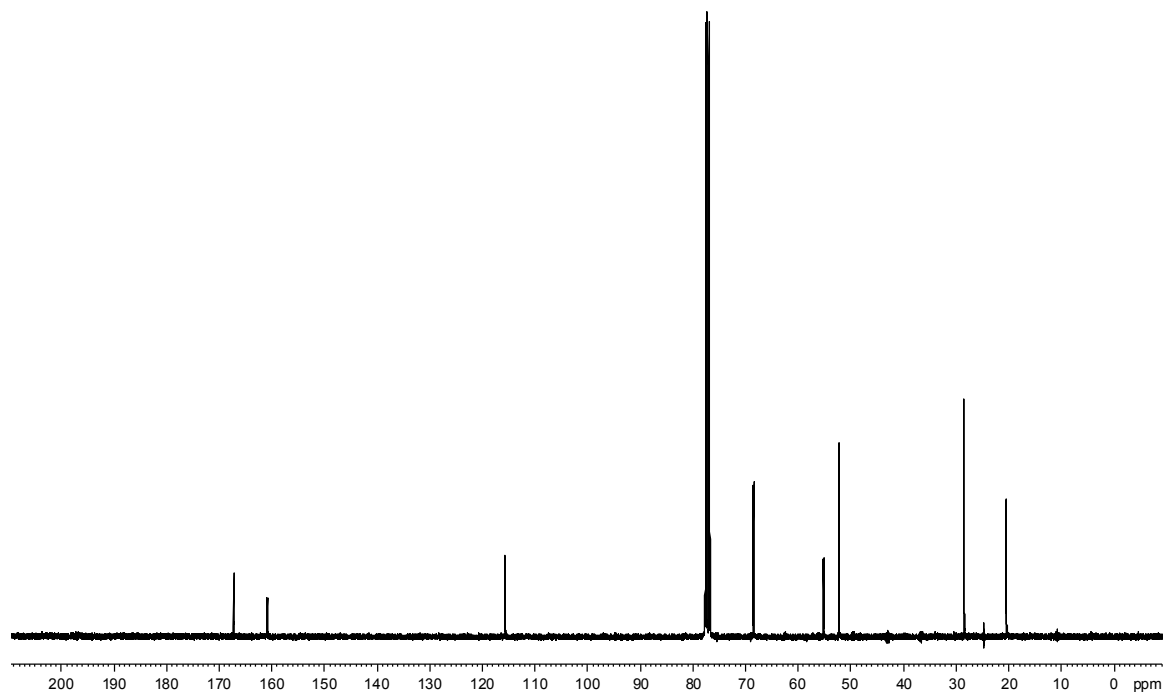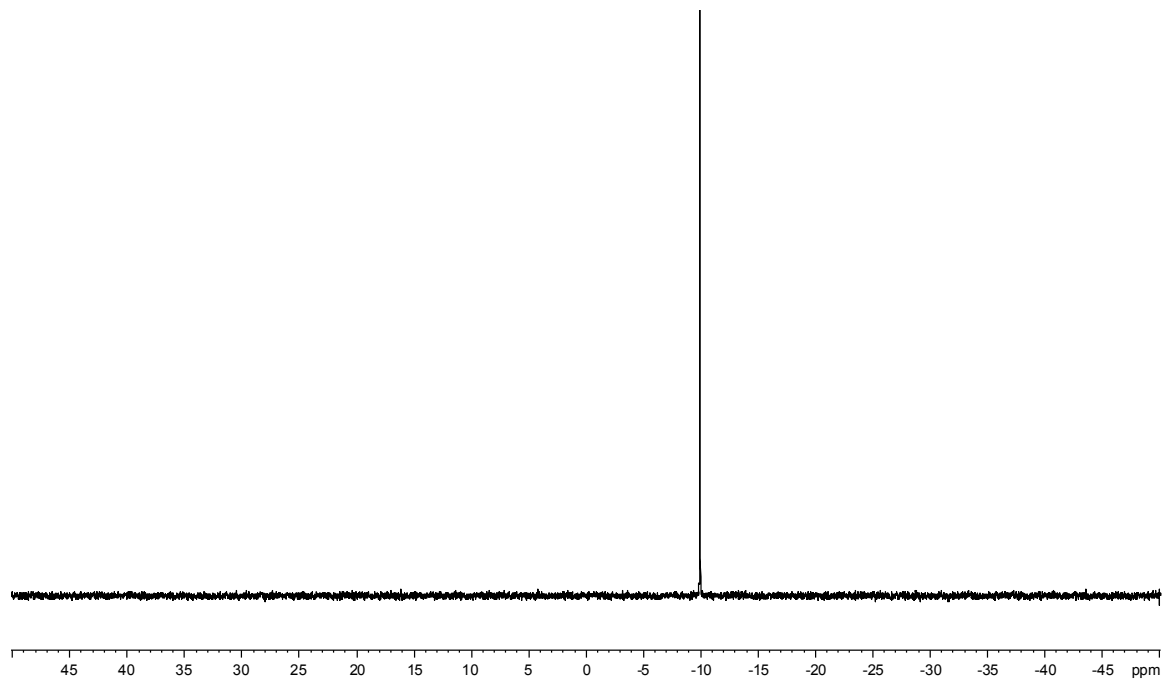

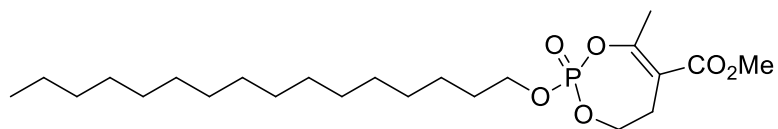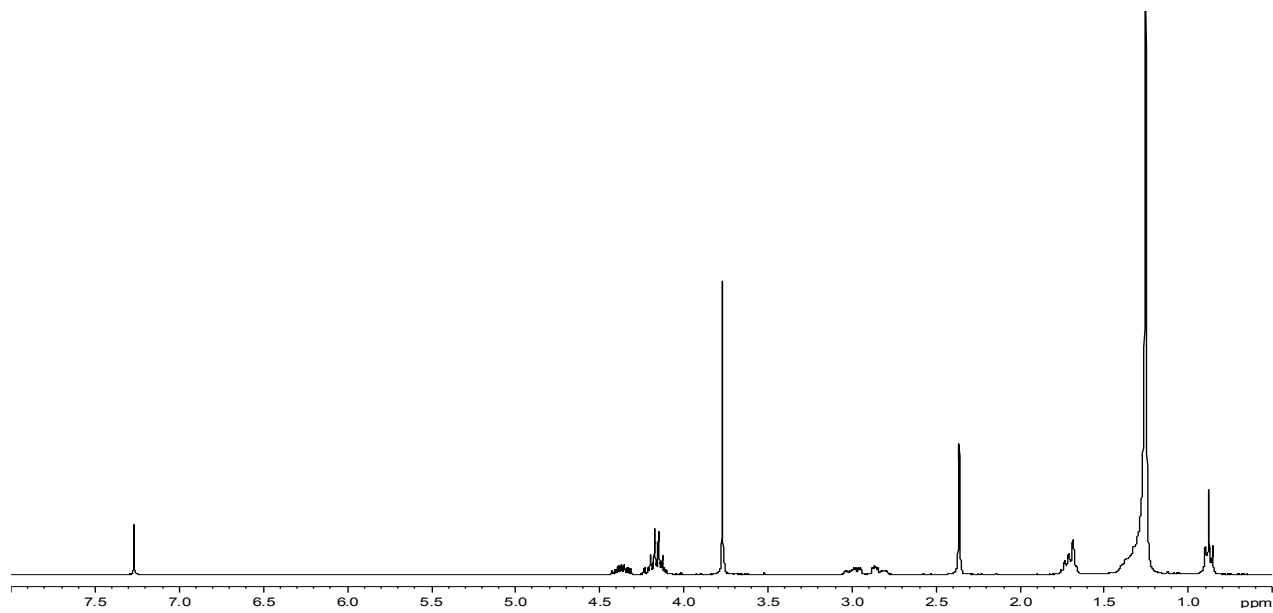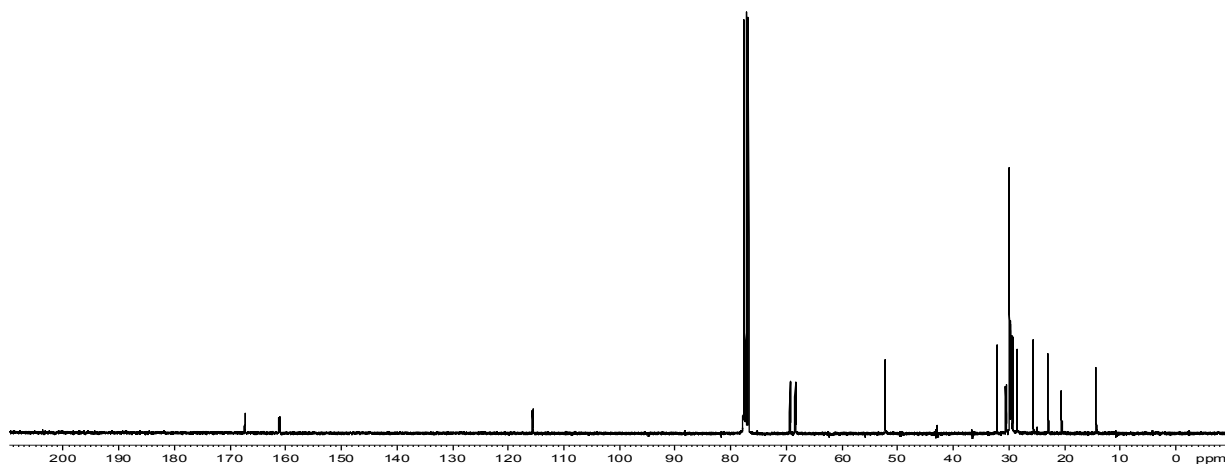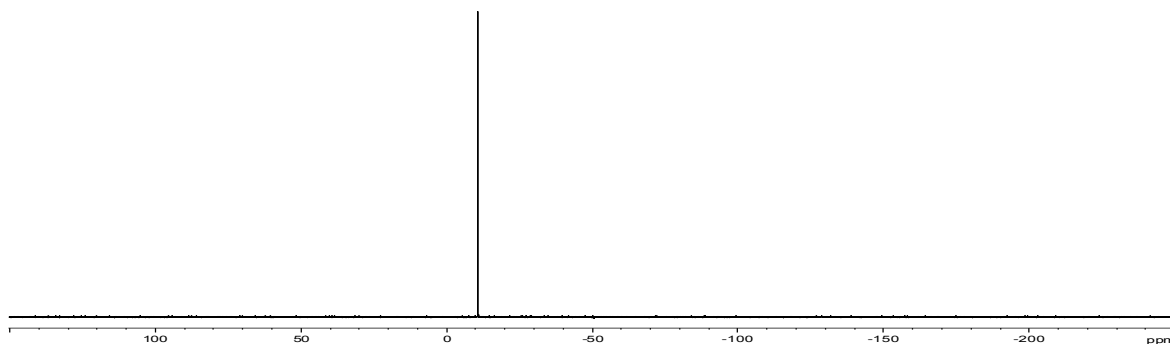

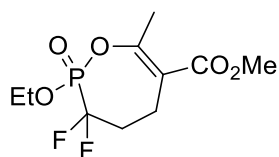

**Methyl 2-ethoxy-3,3-difluoro-7-methyl-2,3,4,5-tetrahydro-1,2-oxaphosphepine-6-carboxylate 2-oxide (XX).**

IR (neat, NaCl, 2956, 2925, 1719, 1655  $\text{cm}^{-1}$ );  $^1\text{H}$  NMR (300 MHz,  $\text{CDCl}_3$ )  $\delta$  4.43 (2H, dq,  $J_{HP} = 8.4$  Hz,  $J_{HF} = 7.1$  Hz), 3.78 (3H, s), 2.65–2.77 (1H, m), 2.46–2.58 (1H, m), 2.40 (3H, s), 2.14–2.42 (2H, m), 1.45 (3H, t,  $J_{HH} = 7.1$  Hz);  $^{13}\text{C}$  NMR (75.4 MHz,  $\text{CDCl}_3$ )  $\delta$  167.3 (d,  $J_{CP} = 2.0$  Hz), 159.2 (d,  $J_{CP} = 8.0$  Hz), 120.3 (td,  $J_{CF} = 261.4$  Hz,  $J_{CP} = 205$  Hz), 120.2 (d,  $J_{CP} = 6.0$  Hz), 65.9 (d,  $J_{CP} = 7.1$  Hz), 52.3, 35.3 (td,  $J_{CF} = 20.6$  Hz,  $J_{CP} = 11.6$  Hz), 21.4, 20.1 (dd,  $J_{CF} = 8.8$  Hz, 3.8 Hz), 16.5 (d,  $J_{CP} = 5.5$  Hz);  $^{31}\text{P}\{^1\text{H}\}$  NMR (121.4 MHz,  $\text{CDCl}_3$ )  $\delta$  1.4 (dd,  $J_{PF} = 111.4, 100.9$  Hz);  $^{19}\text{F}\{^1\text{H}\}$  NMR (282.2 MHz,  $\text{CDCl}_3$ )  $\delta$  -109.6 (dd,  $J_{FF} = 290.5$  Hz,  $J_{FP} = 100.8$  Hz), -106.3 (dd,  $J_{FF} = 290.5$  Hz,  $J_{FP} = 111.5$  Hz); HRMS (FAB, NBA,  $\text{MH}^+$ ) calcd for  $\text{C}_{10}\text{H}_{15}\text{F}_2\text{O}_5\text{P}$ : 285.0703, found 285.0708.

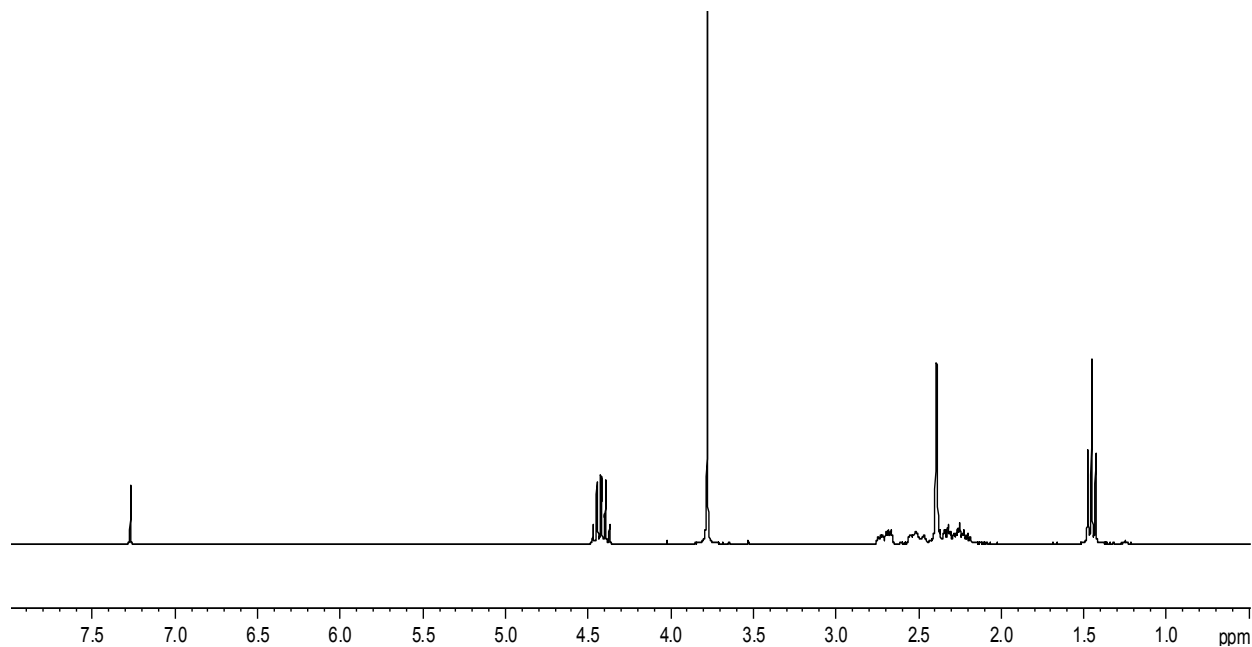

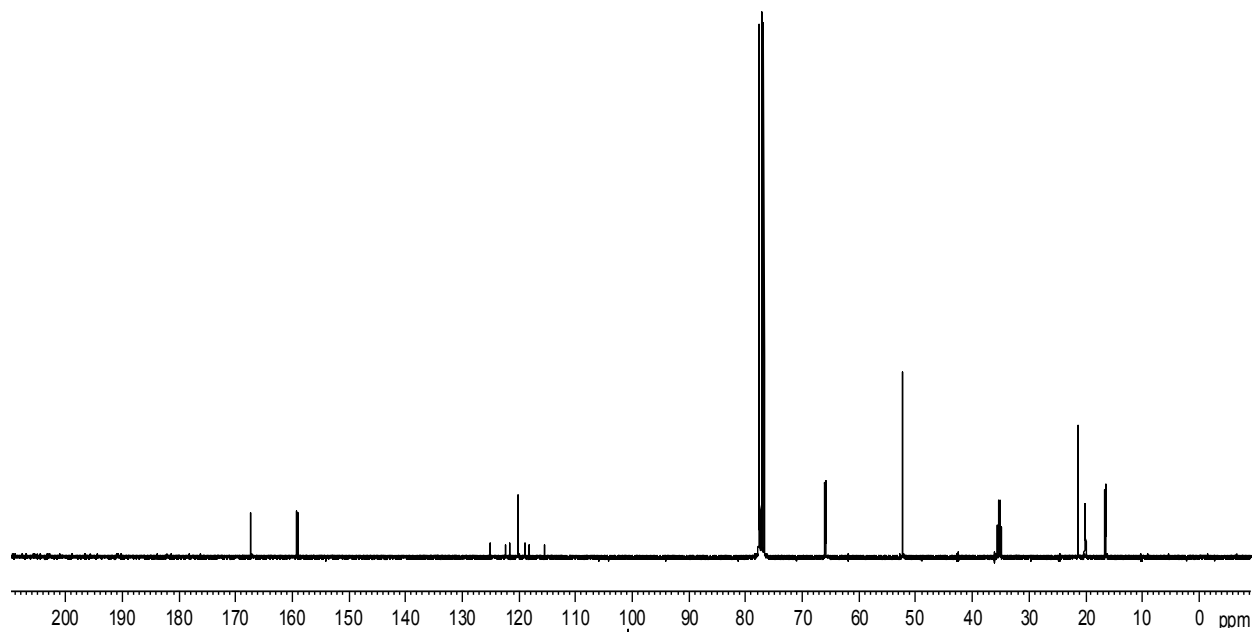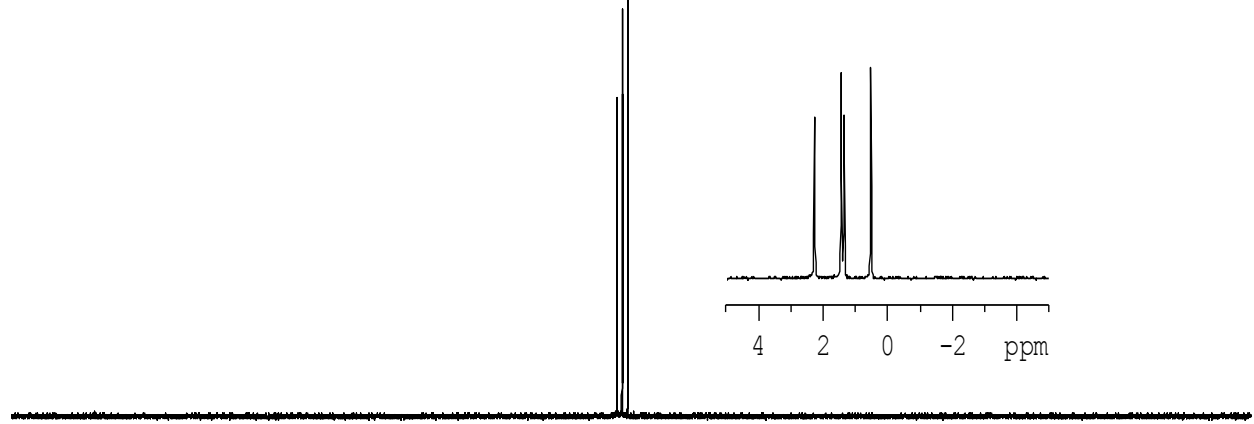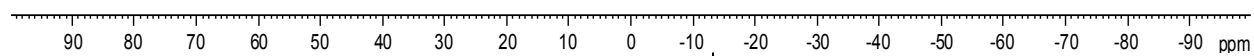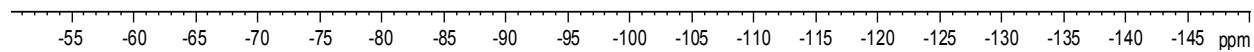

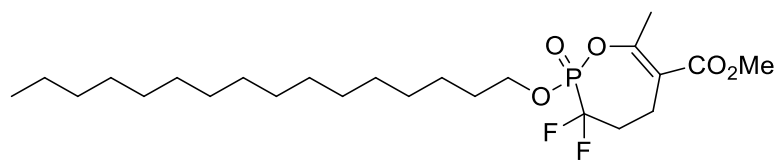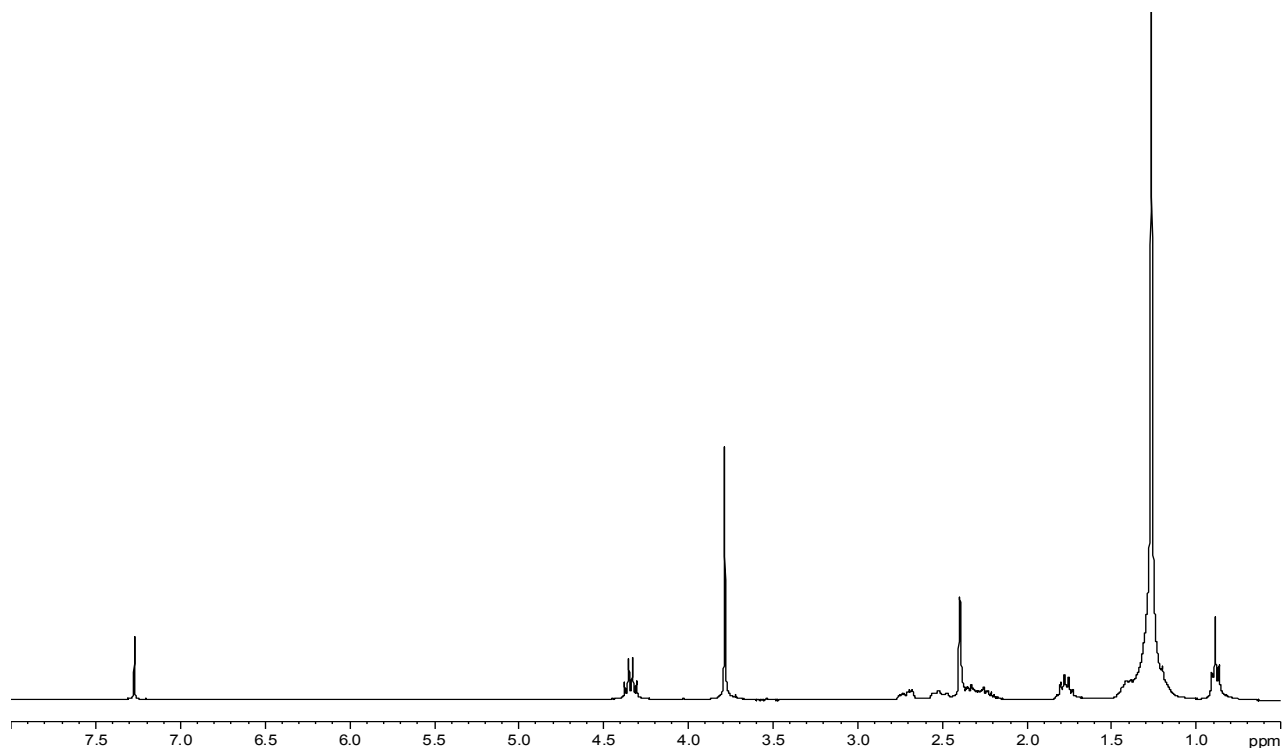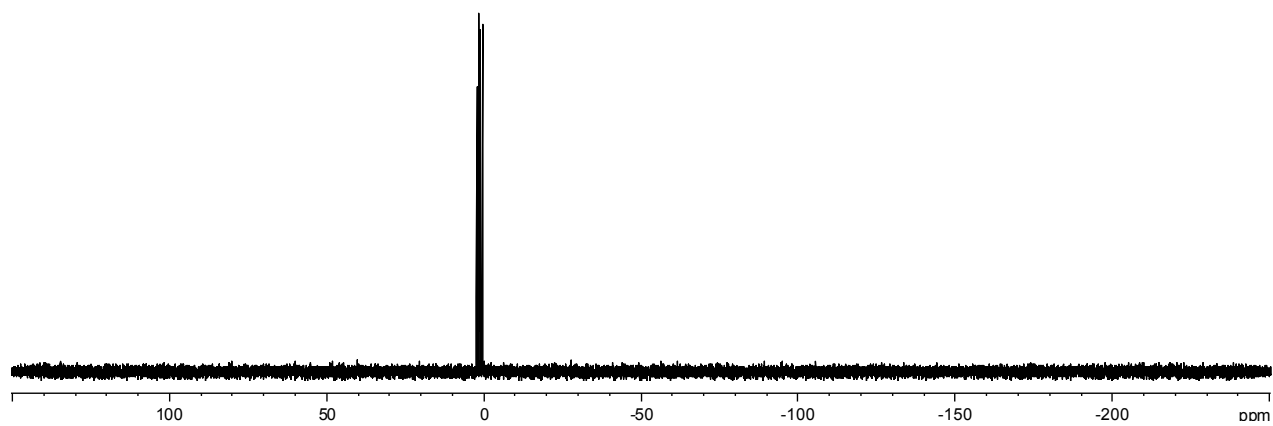

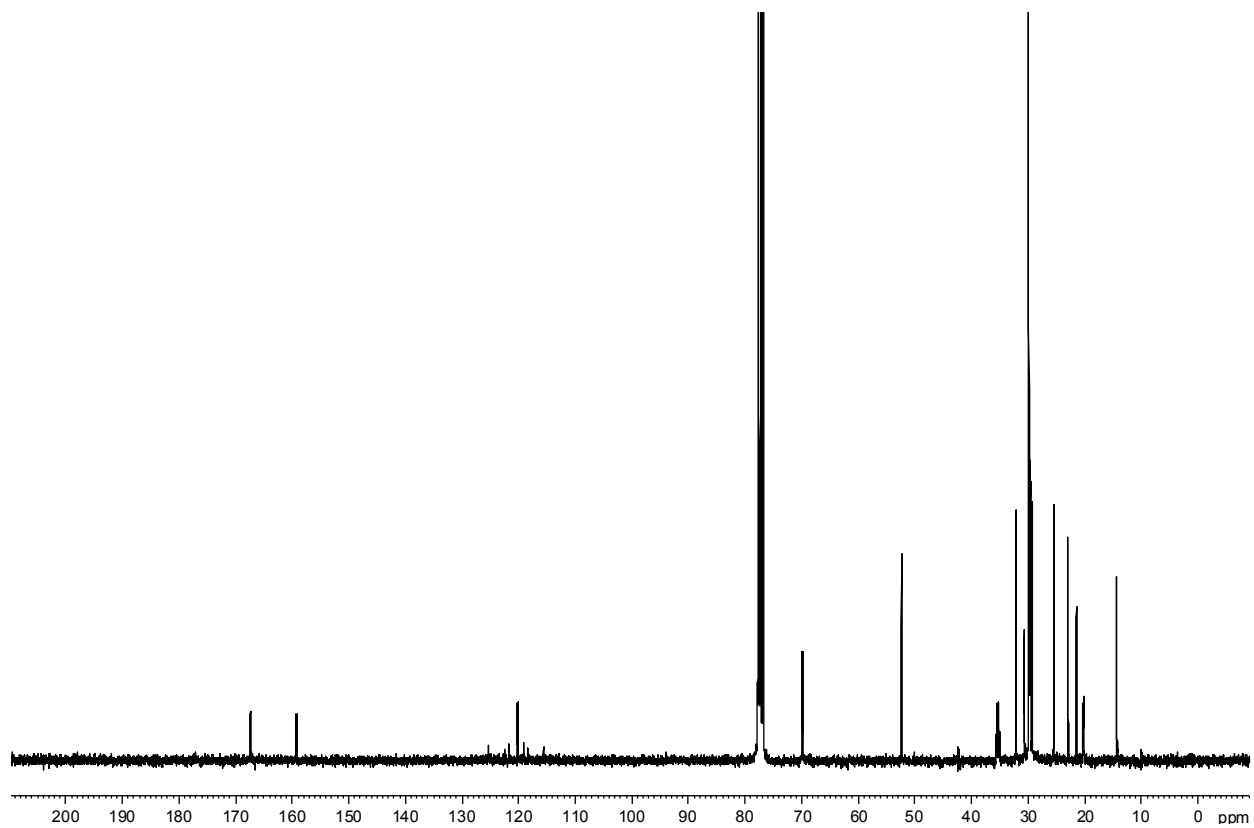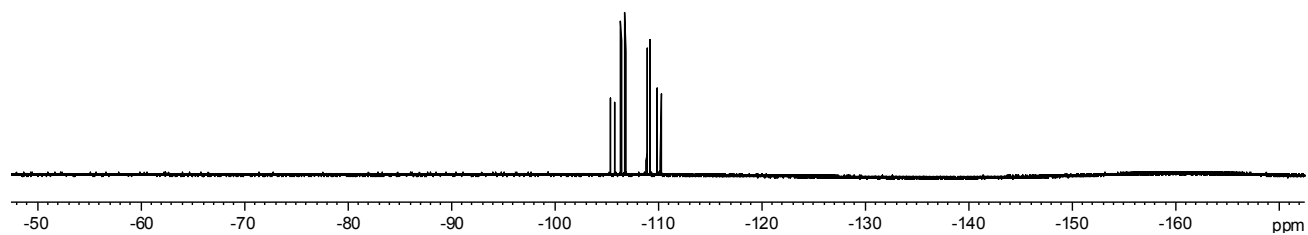

Supplement: NIHMS662922-supplement.pdf [file NIHMS662922-supplement.pdf]
